# Supplementary material
Source: publisher site journal article supplement (https://www.spandidos-publications.com/975/downloadSupplementary)

Figure S1. Effect of MCP-1 on the proliferation of FLSs examined by 5-Bromo-2-deoxyuridine kit. MCP-1 at 100, 200 and 500 ng/ml significantly increased the proliferation of FLSs. Data are presented as the mean  $\pm$  SEM. \*\*\* $P$ <0.001 vs. control group (0 ng/ml MCP-1). MCP-1, monocytes chemotactic protein 1; FLSs, fibroblast-like synoviocytes.

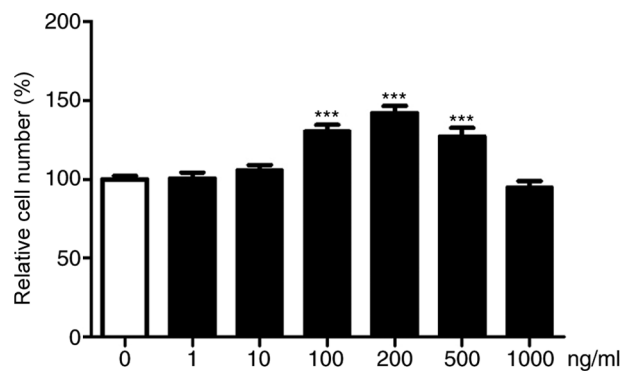

Figure S2. Effect of MCP-1 on the mRNA expression levels of VEGF and CD31. MCP-1 significantly increased the mRNA expression levels of (A) VEGF and (B) CD31 in FLSs, but not TNF- $\alpha$ . The present study observed that the increased expression levels of (C) VEGF and (D) CD31 induced by MCP-1 were also significantly reduced by PI3K and P38 inhibitors. Data are presented as the mean  $\pm$  SEM. \*\*P<0.01, \*\*\*P<0.001 vs. control group. ###P<0.001 vs. MCP-1 group. MCP-1, monocytes chemo-tactic protein 1; VEGF, vascular endothelial growth factor; SB, SB203580; LY, LY294002; TNF- $\alpha$ , tumor necrosis factor- $\alpha$ .

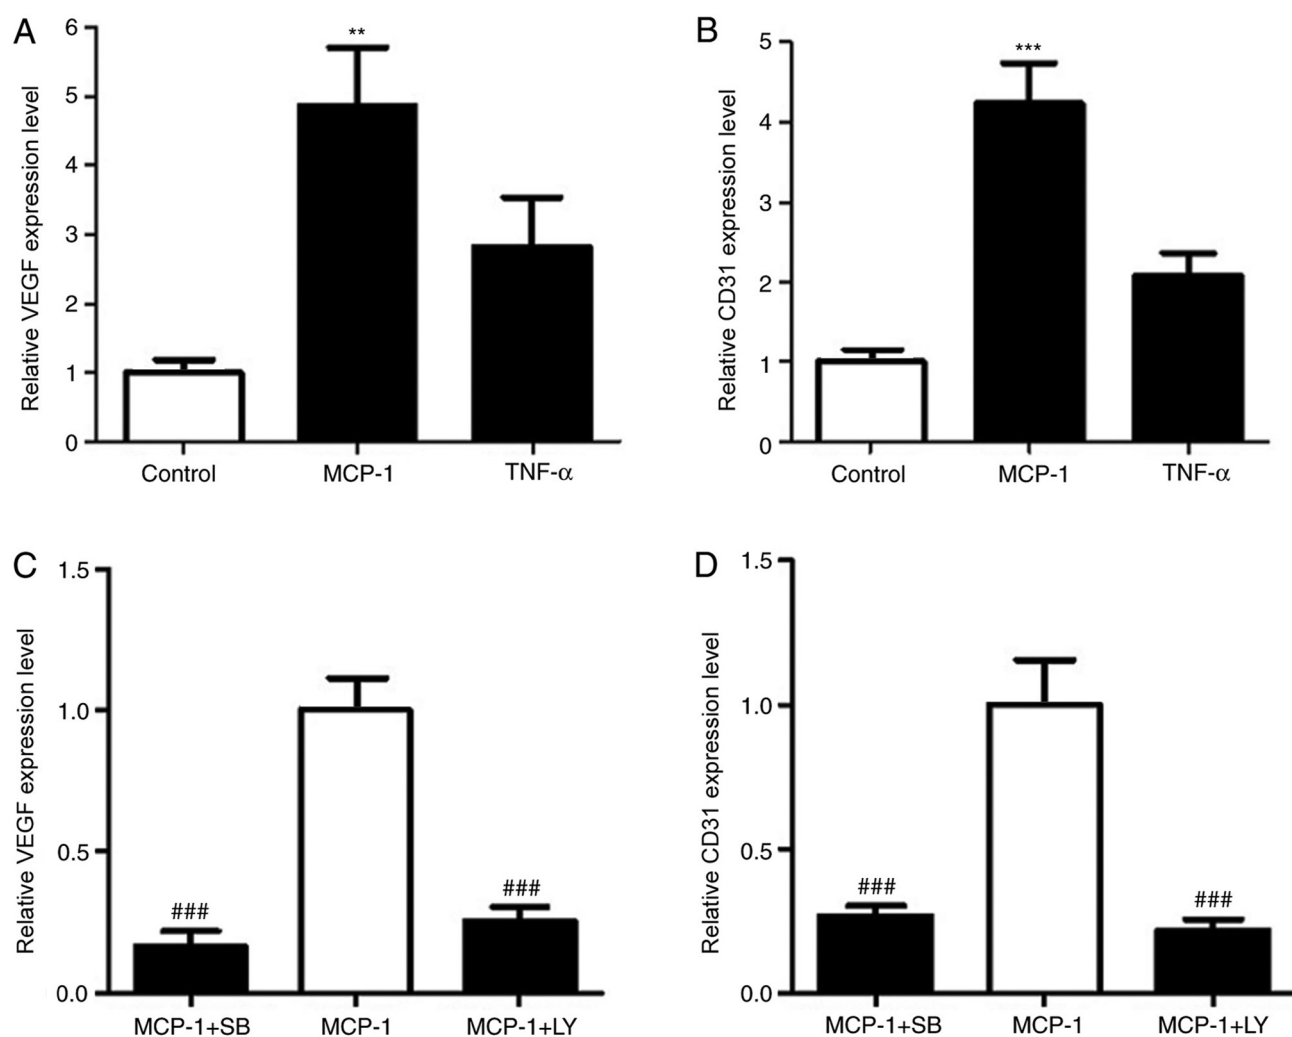

Supplement: Supplementary file 1 [file downloadSupplementary]
